# Supplementary material
Source: Research Square preprint supplement (doi:10.21203/rs.3.rs-7225809/v1)
Supplement: Supplementary file 1 [file 28653c383085218e93beeb65.docx]

**Joint Beamforming for RIS Assisted ISAC Systems with Discrete Phase Shifts: A DRL Based Approach**

| **Author** | **Name** | **Biography** | **Picture** |
| --- | --- | --- | --- |
| Corresponding Author | Zain Mustafa | Mr. Zain Mustafa is a postgraduate student with the Department of Electrical Engineering, National University of Sciences and Technology, Islamabad, Pakistan. | 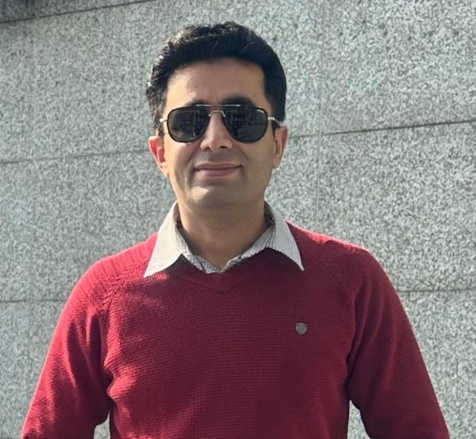 |
| Co-Author 1 | Faisal Akram | Associate professor Faisal Akram is Head of Department of Electrical Engineering, National University of Sciences and Technology, Islamabad, Pakistan. | 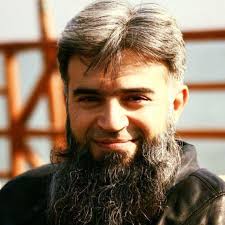 |
| Co-Author 2 | Ahsan Khan | Mr. Ahsan Khan is a postgraduate student with the Department of Electrical Engineering, National University of Sciences and Technology, Islamabad, Pakistan. | 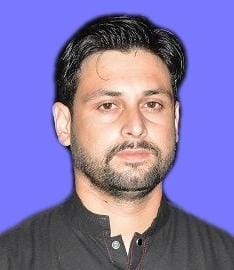 |
